# Supplementary material
Source: PubMed Central journal article supplement (PMC7720272)
Supplement: NIHMS1646193-supplement-Supplemental_Data.pdf [file NIHMS1646193-supplement-Supplemental_Data.pdf]

## Appendix A. Supplementary data

The following are the supplementary data related to this article:

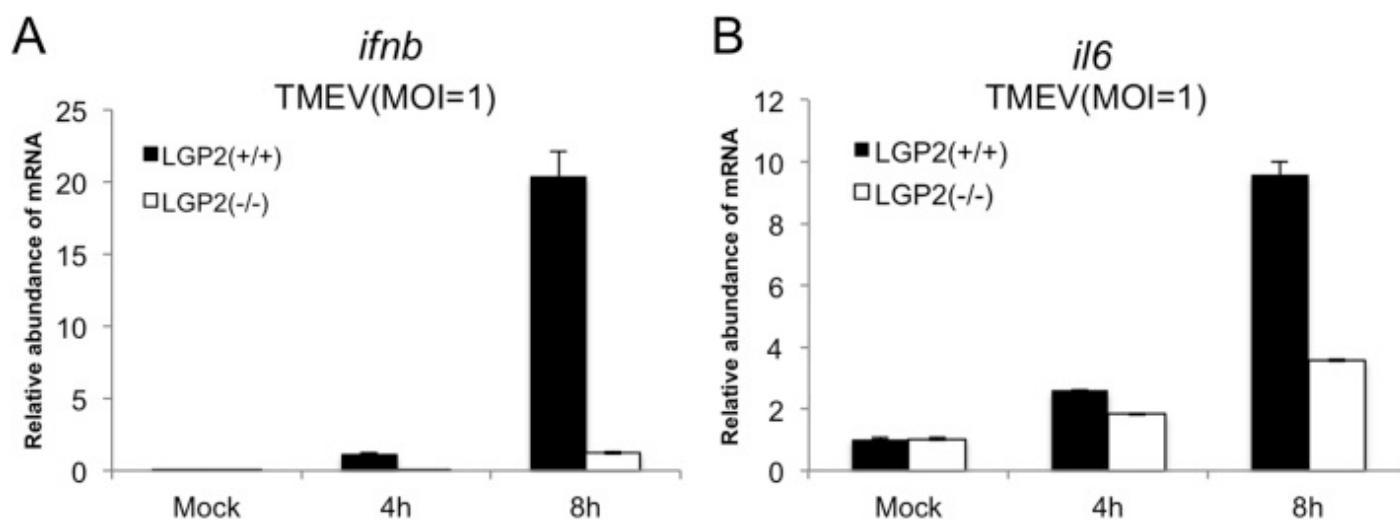

[Download : Download high-res image \(176KB\)](#)

[Download : Download full-size image](#)

Supplementary Fig. 1. **LGP2** is required for TMEV-triggered immune responses. Embryonic fibroblasts from LGP2 (+/+) or LGP2 (-/-) mouse were infected with TMEV for indicated time period. Cells were harvested for total RNA preparation and subjected to quantitative PCR to quantify IFN $\beta$  (A) and **IL-6** mRNA (B). Data represent the average ( $n = 2$ )  $\pm$  the standard deviation.

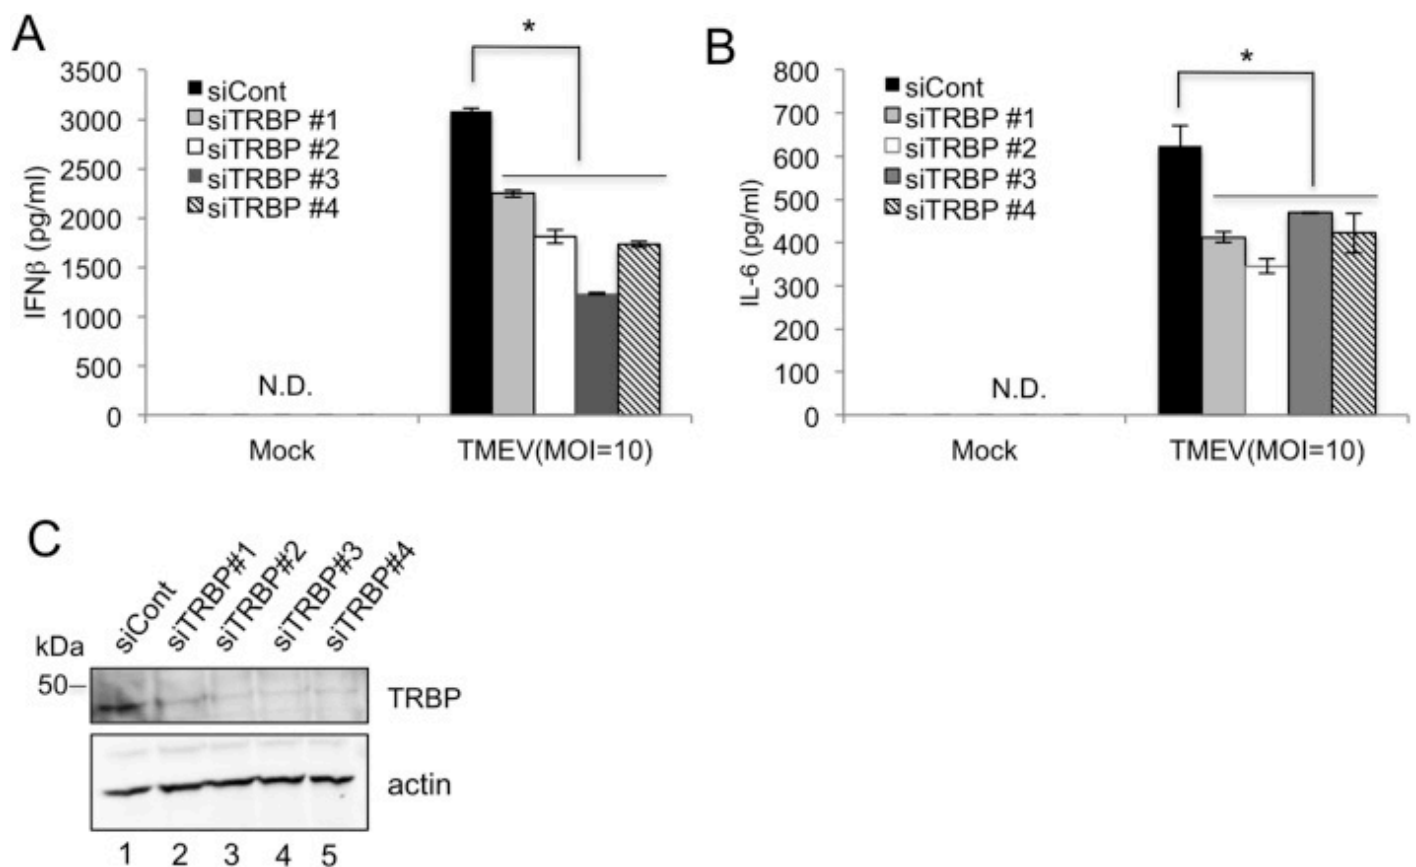

[Download : Download high-res image \(380KB\)](#)

[Download : Download full-size image](#)

**Supplementary Fig. 2. TRBP positively regulates secretion of IFN $\beta$  and IL-6 mediated by TMEV infection in L929 cells.** L929 cells are transfected with four individual TRBP siRNAs or control siRNA and infected with TMEV at MOI = 10 for 24 h. IFN $\beta$  (A) and IL-6 (B) secreted in the media are measured by ELISA. Corresponding cells subjected to siRNA knock down are harvested for Western blot to confirm efficiency of TRBP knock down (C).

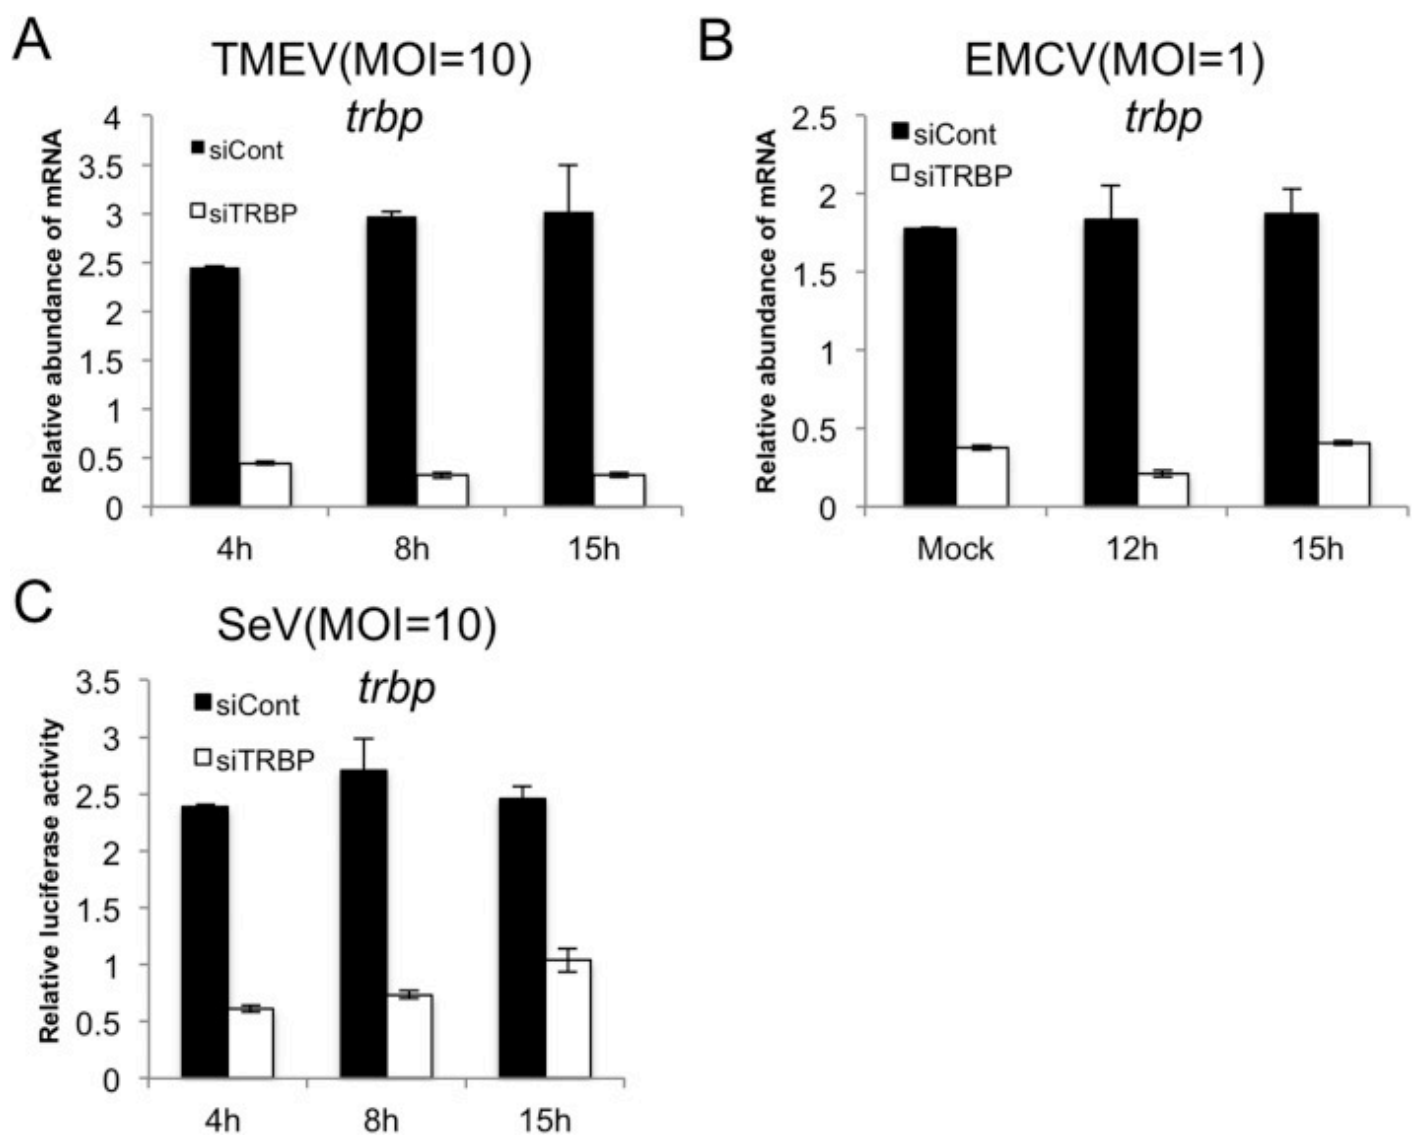

[Download : Download high-res image \(348KB\)](#)

[Download : Download full-size image](#)

**Supplementary Fig. 3. Efficiency of TRBP Knockdown.** L929 cells transfected with pooled TRBP siRNAs (mixture of four) and infected with TMEV (A), EMCV (B) or SeV (C) in Fig. 3 were harvested for quantitative TRBP mRNA as in Fig. 3.
